# Supplementary material
Source: publisher site journal article supplement (https://www.dovepress.com/article/370114)
Supplement: Supplementary file 1 [file get_supplementary_file.php]

**Table S1 The expression level of 130 metabolites in samples**

| label                        | Baicalein   | Baicalein   | Baicalein   | Baicalein   | Baicalein   | Baicalein   | Control     | Control     | Control     | Control   |
|------------------------------|-------------|-------------|-------------|-------------|-------------|-------------|-------------|-------------|-------------|-----------|
| Palmitic Acid                | 117451355   | 1192428286  | 912179668.5 | 1406119117  | 131730838   | 65662388.73 | 762591521.7 | 2354156462  | 1524702476  | 891344200 |
| Adenosine                    | 206993227.8 | 911982158.7 | 777790969.5 | 330113550.4 | 1937354834  | 1150144064  | 514981613   | 965400664.9 | 411371436.8 | 1.216E+09 |
| Isoleucine                   | 837096216.8 | 1551970951  | 1182347334  | 900865746.9 | 1474045588  | 872528005.3 | 316201306.7 | 1089161669  | 280831942.9 | 1.068E+09 |
| Olanzapine-1                 | 767077.9611 | 2896706.825 | 1669766.671 | 622945.9657 | 503317.5757 | 1240462.657 | 4545497.165 | 3883607.334 | 2382296.897 | 2064684.8 |
| Formononetin                 | 639554.7117 | 534691.2522 | 760963.4559 | 679253.3589 | 735983.4547 | 508965.0129 | 961995.7373 | 545682.7033 | 574826.1959 | 1761042.3 |
| CLOFAZIMINE                  | 324778.0439 | 276108.5616 | 336035.5981 | 415180.5669 | 334827.782  | 232790.9754 | 2578428.757 | 6234311.761 | 29070164.36 | 1082351.2 |
| Olanzapine                   | 370127.433  | 2459120.256 | 1364511.324 | 275950.0959 | 362017.3424 | 880711.9341 | 3891602.14  | 3959692.954 | 1364929.782 | 1375074   |
| Genistein-1                  | 433885.0136 | 206594.4617 | 108524.7808 | 518819.5742 | 274482.2924 | 88162.19666 | 51442.09209 | 327301.5128 | 47473.57644 | 480757.88 |
| L-(+)-Lactic acid            | 17487717.55 | 335454208.4 | 186451291.5 | 23618974.18 | 209287309.7 | 97868882.47 | 35145453.85 | 134922398.7 | 29853744.56 | 216288864 |
| L-Glutamic acid-1            | 283038441.5 | 364011330   | 474455084.3 | 201474406.1 | 487978903.8 | 428098889.6 | 202287360.4 | 330873597.7 | 318386156.9 | 368966784 |
| D-(+)-Proline                | 114017961.2 | 262593480.7 | 221043778.1 | 116441341.2 | 278361333.4 | 241006686   | 29144649.73 | 215485253.4 | 53262545.08 | 254019892 |
| Choline monomethyl phosphate | 141845411.9 | 251796197.3 | 136604672   | 174468118.5 | 264163213.8 | 155954912.9 | 108525397   | 206845041.7 | 80304153.71 | 120703365 |
|                              | 152343017.4 | 614732151.8 | 400230811.7 | 179069649.8 | 779625203.3 | 536748948.1 | 206675958.6 | 536285926.1 | 125377150.8 | 529962667 |

|                       |             |             |             |             |             |             |             |             |             |           |
|-----------------------|-------------|-------------|-------------|-------------|-------------|-------------|-------------|-------------|-------------|-----------|
| N-Undecanoylglycerine | 88832867.13 | 77868320.28 | 203865557   | 70492489.89 | 84874373.04 | 71142265.56 | 228108091.5 | 277110337.1 | 125869271.1 | 122789967 |
| DL-Citrulline-1       | 83338207.6  | 127416538.2 | 99383184.82 | 81760368.87 | 100122957.6 | 86004709.19 | 25267026.04 | 101621995.2 | 15794018.22 | 127163893 |
| Chlorpromazine        | 202255.2315 | 171270.6989 | 473735.7899 | 186380.032  | 207133.1401 | 208989.3085 | 302421.4665 | 166043.8567 | 1340600.91  | 190780.11 |
| sphinganine           | 66619031.99 | 30390498.39 | 51856759.88 | 65330509.22 | 48967373.42 | 2224725.753 | 3564259.148 | 18594538.11 | 11433257.56 | 8742534.7 |
| DL-Malic acid         | 200335536.5 | 273839053.9 | 313411758.8 | 248508205.3 | 197045481.8 | 122933892.7 | 167280966.7 | 249322915.7 | 217607770.6 | 187199596 |
| Hypoxanthine          | 85672619.12 | 254845265.7 | 47620928.54 | 210603292.5 | 246569600.6 | 115736628.2 | 209429257   | 103667626.7 | 41628096.06 | 79670152  |
| Creatine              | 231051694.1 | 369427177.7 | 318946575.9 | 242441938.5 | 283902039.4 | 273658457.5 | 145810798.2 | 372429872.3 | 189836275.4 | 329655341 |
| Trifluoroacetic acid  | 402959008.4 | 427833116.4 | 434809371.8 | 418166993.8 | 427010252.5 | 397791466.7 | 445480309.8 | 428934238.2 | 394036074.8 | 409356993 |
| L-Glutamic acid-2     | 115002233.9 | 230483293.1 | 259496381.6 | 154039406.5 | 263217038.6 | 147028724.8 | 113352255.2 | 129004825.3 | 156788232.3 | 171760791 |
| methadone-d9          | 380413129.8 | 372316806.1 | 369793746.4 | 388148190.6 | 353154405.9 | 323763371.3 | 397018411   | 364264002.1 | 349951522.3 | 329021034 |
| Amide C18             | 301459435.4 | 114616973.1 | 120271092.4 | 72156990.89 | 112717690.3 | 29760227.3  | 25515692.52 | 71788177.51 | 51128735.61 | 41096024  |
| Spermidine-1          | 63142775.71 | 109939814.2 | 110175242.9 | 71651621.72 | 65423079.38 | 200929899.2 | 117643249.3 | 182107962.3 | 89815848.14 | 68264171  |
| Genistein             | 387229.9684 | 59530.76699 | 41746.05861 | 502302.4884 | 42412.50294 | 42537.37962 | 37312.94766 | 33387.09097 | 30689.42208 | 82240.835 |
| Diisobutylphthalate   | 210241216.5 | 382575065.9 | 300284661.7 | 272227154.6 | 338879167.7 | 212043889.2 | 135228156.5 | 225879893   | 141671134.4 | 212266219 |

|                            |             |             |             |             |             |             |             |             |             |           |
|----------------------------|-------------|-------------|-------------|-------------|-------------|-------------|-------------|-------------|-------------|-----------|
| DL-<br>Carnitine           | 95248035.66 | 150731210.9 | 319422249.1 | 116935612   | 114687606.1 | 114678632.1 | 69071966.32 | 134880426.1 | 47542618.48 | 112512135 |
| spermidine                 | 55202679.5  | 95929916.48 | 95064158.07 | 61429855.78 | 56916387.22 | 164731104.9 | 101998043.4 | 152197851.5 | 78400773.17 | 60566120  |
| D-<br>Sphingosine          | 132002204.1 | 146091224.5 | 320210033.7 | 198720694.5 | 186860868.8 | 9699909.621 | 3993696.928 | 17514606.78 | 12542846.93 | 15474834  |
| D-(-)-<br>Glutamine        | 106562565.1 | 70048334.75 | 80401820.75 | 73350053.84 | 73649434.08 | 102256646.8 | 56087930.65 | 38814647.66 | 78639796.79 | 42173643  |
| L-<br>Phenylalanine        | 297642098.5 | 217446926.6 | 207466943.2 | 260608785.5 | 204465137.6 | 118457533.5 | 83321469.05 | 143799564.1 | 79552647.15 | 123273937 |
| L-<br>Pyroglutamic acid    | 78225678.15 | 47208106.79 | 57234264.13 | 48421750.21 | 55536900.38 | 85514398.64 | 45497705.67 | 35941904.41 | 60989588.92 | 40722744  |
| S-Allyl-<br>L-<br>cysteine | 13884798.21 | 89173589.7  | 43237403.69 | 26904998.77 | 72205328.62 | 25293557.69 | 2964409.488 | 65173576.19 | 2710218.83  | 66462648  |
| Cinnamyl<br>alcohol        | 17579474.6  | 26503684.41 | 21357313.26 | 16088145.3  | 12546789.2  | 11840180.51 | 14783919.29 | 97831845.6  | 6819605.073 | 67979136  |
| Taurine-<br>l              | 97344070.01 | 69696739.52 | 89174461.84 | 44903041.15 | 62557486.28 | 81208001.13 | 48501217.24 | 85515540.55 | 74210057.69 | 105919638 |
| Thiamine                   | 82259554.26 | 75597589.95 | 88828865.19 | 64230874.62 | 95665952.68 | 57298086.7  | 49023739.51 | 105555704.6 | 46050752.19 | 103425369 |
| Erythrose-4-<br>phosphate  | 25847055.99 | 34575265.63 | 82170303.31 | 11191810.32 | 40228975.05 | 24824998.98 | 23858926.42 | 46565968.3  | 68917731.38 | 55431779  |
| L-<br>Glutamic acid        | 96668225.22 | 107337243.6 | 135033203.8 | 77508121.74 | 157752265.5 | 133653365   | 68826839.29 | 101114720.9 | 75184397.46 | 99507193  |

|                                  |             |             |             |             |             |             |             |             |             |           |
|----------------------------------|-------------|-------------|-------------|-------------|-------------|-------------|-------------|-------------|-------------|-----------|
| Pantothe<br>nic acid             | 14935889.19 | 47857233.31 | 33121966.82 | 14777674.77 | 26113108.92 | 17166806.47 | 23175369.71 | 32247894.63 | 30730287.84 | 27437624  |
| Misopros<br>tol                  | 2080017.271 | 1961457.009 | 2026426.813 | 2237547.839 | 1849569.068 | 1750698.737 | 3814583.805 | 2778097.782 | 2454682.855 | 2742634.4 |
| Ac-Ala-<br>OH                    | 26216669.7  | 51863416.37 | 39885711.83 | 47519248.53 | 92077736    | 47076315.13 | 17865618.5  | 69267992.35 | 45333557.97 | 77776212  |
| Hexitol                          | 15575842.08 | 17702922.75 | 14604827.21 | 15847393.23 | 12441408.81 | 15864043.1  | 14097134.12 | 119561595.9 | 12766185.96 | 63331579  |
| Taurine                          | 61298926.73 | 108300869.9 | 79247359.79 | 60162387.43 | 102760448.1 | 53334134.97 | 30609949.77 | 74950793.78 | 50569178.57 | 79775596  |
| L-<br>Glutamin<br>e              | 51555609.54 | 36710959.23 | 36043801.21 | 36068951.96 | 25208677.89 | 32513694.68 | 31076315.5  | 10312774.03 | 41965061.29 | 10594631  |
| DL-<br>Citruilli<br>ne-2         | 24048646.28 | 42518869.66 | 23902361.03 | 13138745.58 | 30285590.19 | 16571589.94 | 6085939.282 | 28498295.94 | 4673686.514 | 34644656  |
| Creatini<br>ne                   | 27011470.29 | 61092371.02 | 50644652.01 | 33846013.94 | 65236860.48 | 37851022.99 | 29472755.94 | 41475947.84 | 22498853.12 | 67628109  |
| 6-<br>Oxohexan<br>oic acid       | 1301309.017 | 18515610.78 | 12236173.13 | 3181722.151 | 9332767.044 | 5569767.871 | 1016676.57  | 21424966.51 | 812303.9047 | 16458987  |
| Estazola<br>m                    | 1177187.382 | 2524440.092 | 506199.0556 | 1021676.859 | 354652.9421 | 18554558.31 | 15715737.98 | 15459307.09 | 7187533.536 | 9104246.3 |
| Indole-<br>3-<br>acrylic<br>acid | 109031534   | 71501408.47 | 66269189.47 | 120691108.8 | 64518870.53 | 37957496.95 | 21767015.52 | 22752124.22 | 21341851.71 | 11938447  |
| Pyrophos<br>phoric<br>Acid       | 89789064.93 | 67412005.24 | 58566451.66 | 107522464.6 | 88440546.27 | 118512081.8 | 78504083.81 | 107195043   | 76850563.04 | 96302082  |
| Caprolac<br>tam-1                | 43914819.57 | 55954598.34 | 65688523.49 | 48966276.65 | 66949499.29 | 49094117.83 | 29204557.71 | 54965022.58 | 41246897.85 | 43350464  |
| L-(+)-<br>Aspartic<br>acid       | 21396611.1  | 47313504.59 | 35941303.83 | 17595545.31 | 20597988.64 | 22560656.88 | 16825170.06 | 30189663.93 | 21137599.34 | 40869030  |

|                                       |             |             |             |             |             |             |             |             |             |           |
|---------------------------------------|-------------|-------------|-------------|-------------|-------------|-------------|-------------|-------------|-------------|-----------|
| Ketotifen                             | 819474.6546 | 733484.2477 | 760490.6518 | 633549.6504 | 722125.291  | 618325.8363 | 1123464.958 | 815352.1117 | 644268.138  | 684267.51 |
| D-Mannose                             | 17866621.18 | 48758966.25 | 14650684.02 | 33696523.19 | 38112502.67 | 73010308.6  | 79797219.09 | 91942819.64 | 38335120.76 | 104735081 |
| 6-phosphate                           | 77642202.98 | 71702375.32 | 60979906.3  | 76035361.43 | 59620327.56 | 49550034.02 | 27659688.73 | 45746462.15 | 24458933.39 | 41472016  |
| L-(-)-Methionine-1                    | 20355027.91 | 32267775.25 | 17056481.77 | 13049343.04 | 15949447    | 22891616.24 | 8031944.623 | 19229200.3  | 13152401.41 | 30877891  |
| L-(-)-Asparagine-1                    | 66073321.99 | 59633888.87 | 51074365.6  | 62374802.35 | 50016465    | 42034928.36 | 23500093.25 | 37141107.02 | 21323378.51 | 32923459  |
| L-(-)-methionine-2                    | 988572.5131 | 921736.9838 | 1136000.821 | 1001991.672 | 1077473.17  | 869862.9501 | 1439549.2   | 861680.4554 | 899306.3013 | 870035.56 |
| Mycophenolic acid                     | 22164993.41 | 54858619.68 | 29909354.69 | 18891650.22 | 51538820.23 | 53248067.53 | 45816971.16 | 76862072.02 | 19673191.58 | 84173567  |
| ribulose 5-phosphate                  | 32501924.37 | 47572654.53 | 55337622.41 | 37377106.44 | 70021322.09 | 45675943.67 | 18485419.24 | 54776071.89 | 21214988.23 | 52393928  |
| g-Butyrobetaine (9Z)-9-Octadecanamide | 30996352.6  | 34656177.2  | 54975244.49 | 48987278.22 | 41637082.6  | 2962722.905 | 2899983.925 | 6871267.003 | 4701022.141 | 5364802.4 |
| Hypotaaurine                          | 18653751.57 | 26253791.26 | 17344383.55 | 13956663.44 | 12008560.46 | 17208805.09 | 8988553.042 | 33679383.91 | 10731415.33 | 29935076  |

|                                                |             |             |             |             |             |             |             |             |             |           |
|------------------------------------------------|-------------|-------------|-------------|-------------|-------------|-------------|-------------|-------------|-------------|-----------|
| Arabinosylhypoxanthine gamma-Aminobutyric acid | 3057928.583 | 13543942.82 | 7084908.635 | 6763500.832 | 17214316.61 | 14250635.64 | 13098322.06 | 14083516.28 | 2111200.77  | 12693600  |
| DL-Citrulline Sulfamic acid                    | 20292870.71 | 12811757.01 | 15750639.55 | 9084263.011 | 22434886.62 | 14901377.6  | 6753071.287 | 18009753.11 | 7614427.245 | 17625901  |
| Methionine sulfoxide                           | 11585344.96 | 16909955.8  | 13907889.35 | 8618253.717 | 13268334.32 | 10940620.76 | 2366113.507 | 13384444.52 | 1554689.242 | 15745498  |
| DL-Arginine                                    | 1771040.943 | 8623760.918 | 4129784.373 | 1368418.286 | 3931670.799 | 22159029.9  | 12137448.1  | 19794874.41 | 12601993.07 | 22108985  |
| Methylmalonic acid                             | 12428160.54 | 18753456.9  | 16093069.4  | 10832325.62 | 17045228.7  | 17364303.74 | 8394529.868 | 22139818.5  | 11500453.57 | 30395642  |
| Adenosine 5'-monophosphate-1                   | 2050498.254 | 1518133.098 | 1043368.986 | 13675916.81 | 1382883.328 | 2482812.838 | 5859159.588 | 2498625.194 | 31485119.12 | 4141284.3 |
| N-Acetylaspartic acid                          | 1064321.825 | 4561189.786 | 3895171.02  | 4418071.512 | 3880957.813 | 1113954.67  | 7345586.908 | 1606659.252 | 6891008.151 | 1530277.2 |
| Hippuric acid                                  | 8650327.519 | 8328056.168 | 9047587.091 | 7258774.659 | 7263030.298 | 32695858.93 | 7212949.228 | 10664368.71 | 13484862.3  | 13161136  |
| Nicotinamide                                   | 15896585.8  | 42324420.44 | 44734064.8  | 12733804.99 | 43411766.78 | 31045114.22 | 11666477.35 | 47818455.52 | 13396614.52 | 40707006  |
|                                                | 454583.4355 | 7201278.847 | 2603345.689 | 660153.8093 | 1614120.056 | 1420661.837 | 790419.5507 | 2584386.292 | 416699.2153 | 2484770.7 |
|                                                | 8850858.602 | 21570214.5  | 21740830.35 | 6820896.61  | 24879379.08 | 23124624.41 | 8437012.323 | 24560422.62 | 11044379.69 | 27368217  |

|                                         |             |             |             |             |             |             |             |             |             |           |
|-----------------------------------------|-------------|-------------|-------------|-------------|-------------|-------------|-------------|-------------|-------------|-----------|
| Glycerol<br>3-<br>phosphat<br>e         | 10468639.36 | 24524883.69 | 20750767.76 | 6069211.227 | 30228532.91 | 39847373.16 | 12195375.96 | 30201715.64 | 10492585.18 | 30010665  |
| noradren<br>aline                       | 1415289.711 | 10265524.55 | 8422717.685 | 1855325.056 | 6969046.552 | 4054555.466 | 1258890.203 | 6129689.704 | 1327599.287 | 3229447.5 |
| Dihydr<br>ot<br>hymine<br>(E)-p-        | 4706644.694 | 11674678.34 | 10848958.18 | 3040862.228 | 11615776.22 | 10482953.63 | 3606045.922 | 16793608.72 | 3981712.526 | 19321946  |
| coumaric<br>acid                        | 21223622.72 | 21782933.48 | 19093715.57 | 17697142.11 | 18503482.45 | 12364438.39 | 4115244.816 | 23738466.5  | 8755078.835 | 24485177  |
| propiony<br>lcarniti<br>ne              | 7909611.993 | 19174566.81 | 17251423.81 | 8891924.151 | 25681885.48 | 12348678.88 | 2546932.973 | 17497326.27 | 2793328.909 | 16120172  |
| Fomepizo<br>le                          | 5499302.677 | 5481818.189 | 5189799.922 | 5500420.038 | 6024054.63  | 5449505.221 | 4049697.234 | 4077652.018 | 6173260.87  | 4806843.4 |
| Flavin<br>mononucl<br>eotide            | 4593647.559 | 10486259.2  | 6123254.741 | 5445679.953 | 5549670.702 | 8204623.458 | 4964094.425 | 10574765.47 | 6646660.268 | 15471850  |
| N-<br>Acetyl-<br>L-<br>aspartic<br>acid | 6900960.717 | 19116977.95 | 22561855.1  | 6910527.145 | 29666927.33 | 11346844.9  | 4404339.53  | 22831738.14 | 5133491.876 | 21318400  |
| L-<br>Hydroxyp<br>roline                | 16130097.51 | 21073142.38 | 18518304.7  | 9490544.833 | 18333434.02 | 15036498.56 | 4452418.214 | 17993809.43 | 4472092.606 | 24984238  |
| L-(-)-<br>Threonin<br>e                 | 11444828.96 | 6291840.094 | 7394506.57  | 8104664.84  | 5541038.198 | 7990324.994 | 5668339.394 | 7614064.257 | 6963337.506 | 10630180  |

|                                                   |             |             |             |             |             |             |             |             |             |           |
|---------------------------------------------------|-------------|-------------|-------------|-------------|-------------|-------------|-------------|-------------|-------------|-----------|
| 6-<br>methylte<br>trahydro<br>pterin              | 5824135.459 | 8069264.089 | 2015990.444 | 13134381.14 | 9675389.358 | 6829450.119 | 13680063.52 | 4688125.722 | 3034441.188 | 4133427.2 |
| L-(-)-<br>Asparagi<br>ne                          | 14825025    | 11230555.87 | 11510631.21 | 11286441.31 | 19206657.83 | 2175540.326 | 2797619.05  | 11595972.93 | 4237534.926 | 12838800  |
| DL-<br>Glutamin<br>e                              | 20199562.7  | 12374230.97 | 11565776.98 | 15989055.7  | 11354801.17 | 11219911.3  | 6519673.077 | 2915230.976 | 9930480.902 | 2739838.1 |
| DL-<br>Histidin<br>e                              | 2447020.224 | 15073406.12 | 12427473.67 | 3772170.277 | 10810652.27 | 9147755.841 | 830018.2555 | 6692882.018 | 995645.8412 | 5354641.5 |
| g-<br>Glutamyl<br>cysteine<br>l-                  | 5033713.362 | 5169389.354 | 5470703.817 | 6136991.898 | 5579745.095 | 4094420.112 | 1926732.497 | 4273431.76  | 2948459.414 | 3908145.6 |
| Histidin<br>al                                    | 14053166.61 | 14050149.95 | 17688428.95 | 10537872.69 | 16126865.78 | 9174645.665 | 8009872.786 | 10803677.39 | 6756903.238 | 13677830  |
| TROLEAND<br>OMYCIN<br>Cyclo(le<br>ucylprol<br>yl) | 3653818.387 | 6195926.983 | 3382031.606 | 8484049.302 | 7043852.177 | 1596459.395 | 9010086.204 | 3757349.469 | 2626796.657 | 2799643.1 |
| putresci<br>ne                                    | 1255581.592 | 25502277.26 | 795264.542  | 982899.0899 | 942348.0917 | 3116895.339 | 1262658.966 | 774778.7019 | 609600.1354 | 671859.76 |
| N-<br>methylpr<br>oline                           | 6415225.146 | 16077316.3  | 13327800.43 | 8421043.966 | 15027022.78 | 16203351.76 | 13416433.72 | 17336251.78 | 15128156.72 | 19454160  |
| N-<br>Tridecan<br>oylglyci<br>ne                  | 5312969.457 | 18128178.19 | 6946417.272 | 9208315.811 | 24187141.77 | 13325454.58 | 3083274.409 | 8317023.413 | 6893821.246 | 7742883.2 |
|                                                   | 3553294.719 | 2039880.541 | 6475391.981 | 1898107.565 | 2986926.64  | 2810540.499 | 7018470.774 | 10394897.48 | 4354158.667 | 2720613.3 |



|                                        |             |             |             |             |             |             |             |             |             |           |
|----------------------------------------|-------------|-------------|-------------|-------------|-------------|-------------|-------------|-------------|-------------|-----------|
| Adenine                                | 4306415.819 | 12741883.84 | 4717009.339 | 5584212.906 | 8624092.619 | 8092760.937 | 2542125.223 | 8749104.225 | 1107665.064 | 9961700.8 |
| L-(-)-<br>Methioni<br>ne               | 10683425.18 | 10356746.93 | 8127340.294 | 10690128.24 | 8746031.563 | 8172073.503 | 4936509.126 | 8308019.933 | 4012369.534 | 6153611.1 |
| Pregabal<br>in                         | 8005906.764 | 13016610.11 | 12590258.02 | 6165175.664 | 11551673.66 | 9536464.717 | 5815936.599 | 13812177.54 | 5105768.706 | 15106116  |
| 3-<br>(Sulfoox<br>y)-L-<br>tyrosine    | 10648257.43 | 12861689.73 | 12696752.54 | 9391742.497 | 12887892.72 | 10660374.51 | 4051090.327 | 11361158.67 | 4312325.952 | 11289908  |
| Nitrazep<br>am                         | 358922.6688 | 418213.3494 | 475455.1393 | 17138225.24 | 403363.2709 | 513881.5939 | 2253496.758 | 2800889.917 | 857868.5684 | 1326462.3 |
| .alpha.-<br>Aminoadi<br>pic acid       | 3589779.857 | 5553068.72  | 5176548.741 | 3558012.283 | 5466368.233 | 5120757.093 | 2660591.349 | 4834319.686 | 1968839.55  | 6436861.6 |
| DL-<br>Ceruleni<br>n                   | 10207703.91 | 9755505.116 | 9765760.808 | 8619791.391 | 9722046.651 | 11487655.59 | 12153573.28 | 8750786.961 | 10609143.42 | 10084700  |
| Pyridoxa<br>l                          | 2622630.762 | 1953007.307 | 2893768.188 | 2762168.574 | 2936854.144 | 1655009.3   | 468922.2717 | 2155108.087 | 443250.0037 | 2404157.2 |
| Adenosin<br>e 5'-<br>monophos<br>phate | 1300610.48  | 1624881.209 | 1643510.073 | 936818.4423 | 1454529.38  | 2288809.064 | 1193977.784 | 1940087.231 | 2748535.531 | 2212905   |
| Caprolac<br>tam                        | 9700493.9   | 5891718.368 | 8889843.262 | 6572264.671 | 9169695.359 | 7154830.008 | 6829914.001 | 9114699.603 | 7829512.389 | 10684625  |
| Hispidul<br>in                         | 120248.94   | 98569.05313 | 111205.8364 | 112069.72   | 130924.1343 | 98755.74836 | 52245.53817 | 55284.71046 | 51320.38662 | 54921.243 |
| 8-<br>hydroxy-<br>deoxygua<br>nosine   | 1410727.118 | 9987806.914 | 4944571.209 | 1931268.591 | 11637885.98 | 11230759.23 | 11419668.8  | 9762965.934 | 1792122.816 | 8552287.3 |

|                                          |             |             |             |             |             |             |             |             |             |           |
|------------------------------------------|-------------|-------------|-------------|-------------|-------------|-------------|-------------|-------------|-------------|-----------|
| 2S-<br>Amino-<br>tridecan<br>oic acid    | 708717.7681 | 589256.5209 | 362386.2621 | 676913.7474 | 792210.9079 | 861165.2699 | 9111444.806 | 12770427.04 | 3211701.208 | 3123205.9 |
| N-<br>Acetylne<br>uraminic<br>acid       | 1069327.784 | 896844.6295 | 1314191.264 | 848831.4239 | 1848713.571 | 3548251.732 | 1533807.323 | 1731347.142 | 1935893.968 | 2781720.5 |
| Fumaric<br>acid                          | 3000083.414 | 13099938.72 | 7346135.263 | 3074452.614 | 9394541.608 | 5223513.462 | 3902257.219 | 8342021.503 | 4629274.307 | 7935135.8 |
| acetylsp<br>ermine<br>alpha-             | 410285.6568 | 1606384.158 | 1723320.978 | 421191.8475 | 1129983.693 | 1483305.679 | 408602.9323 | 3323472.051 | 452510.9893 | 1090944.4 |
| Ketogluc<br>aric<br>acid                 | 1029095.751 | 485237.8417 | 2925271.399 | 795459.629  | 1474057.808 | 894188.4755 | 708307.6589 | 3519017.311 | 817115.0621 | 3392100.1 |
| meglumin<br>e                            | 4236394.926 | 3376337.972 | 5802006.678 | 4406769.392 | 4171704.846 | 5213533.401 | 8796383.396 | 2996972.68  | 1921905.335 | 2893339.7 |
| N-<br>Acetyl-<br>L-<br>histidin<br>e     | 161867.1247 | 2820612.415 | 1381680.074 | 174084.526  | 901921.7884 | 706824.089  | 356123.3918 | 1695908.418 | 233890.5536 | 1128672.1 |
| beta-L-<br>fucose<br>1-<br>phosphat<br>e | 364778.7335 | 1561707.971 | 1410718.88  | 346723.1542 | 5143159.056 | 2558740.274 | 296978.0305 | 2764345.068 | 286834.8467 | 2784866.4 |
| Guanine                                  | 722750.5934 | 3765930.138 | 1118467.728 | 1623853.179 | 4106603.777 | 1748928.512 | 6306999.032 | 1274728.524 | 540138.1303 | 1198635.3 |
| L-<br>Cysteiny<br>lglycine               | 3412056.501 | 6839102.46  | 7937879.13  | 3656038.342 | 7655492.621 | 5020745.295 | 3414318.993 | 6257201.601 | 4775130.681 | 6100196   |

|                             |             |             |             |             |             |             |             |             |             |           |  |
|-----------------------------|-------------|-------------|-------------|-------------|-------------|-------------|-------------|-------------|-------------|-----------|--|
| D-a-                        |             |             |             |             |             |             |             |             |             |           |  |
| Hydroxyglutaric acid        | 1523992.864 | 2483835.679 | 2221804.747 | 1553403.676 | 2810306.019 | 3045861.712 | 2355900.309 | 2184632.941 | 2801476.769 | 2494039.8 |  |
| Adipic acid                 | 2629810.658 | 2145261.32  | 1984409.116 | 2802949.775 | 922540.554  | 2486662.079 | 5148729.744 | 5351731.846 | 3806855.175 | 2323296.5 |  |
| Luteolin                    | 73738.82609 | 77355.83211 | 79239.80253 | 75432.35822 | 79932.89203 | 73270.17416 | 46940.29154 | 46893.81196 | 45823.99158 | 46929.417 |  |
| Ecgonine                    | 2175610.167 | 1211658.423 | 852357.7903 | 2131016.179 | 3178886.682 | 2403324.097 | 1995575.288 | 964514.4663 | 745226.7414 | 985159.94 |  |
| Metirosine                  | 1815983.934 | 5395222.672 | 5590144.052 | 2278699.736 | 5442746.675 | 3371907.555 | 1951894.729 | 4642779.013 | 3030911.488 | 3566253.7 |  |
| 16-Hydroxyhexadecanoic acid | 733684.1396 | 2674963.744 | 1175986.947 | 653664.7894 | 1731702.242 | 803143.7109 | 577772.3464 | 689828.8707 | 300350.961  | 976118.31 |  |
| g-Guanidinobutyrate         | 1349677.576 | 4798989.338 | 6503509.185 | 1779698.527 | 7876339.857 | 5575486.579 | 834819.7768 | 2581450.068 | 656554.3584 | 2489783.6 |  |
| trimethadione               | 2339253.842 | 2946658.92  | 2081724.223 | 3228614.545 | 2020444.525 | 2296466.917 | 1039452.851 | 1722271.167 | 3224235.364 | 2428007.8 |  |
| acetyltaurine               | 952473.8453 | 3194619.892 | 2640299.205 | 1081640.685 | 3014374.239 | 1982156.209 | 711174.8018 | 5191092.914 | 671008.5413 | 4286420.4 |  |
| 2-Mercaptobenzothiazole     | 87056.84989 | 158031.5196 | 4394526.408 | 1374743.197 | 453333.3307 | 184586.0276 | 41924.09243 | 136929.0764 | 64405.63627 | 169102.07 |  |
| Chrysin                     | 775000.7666 | 7790401.698 | 3862745.392 | 1071608.207 | 3188360.328 | 2261688.755 | 41037.92634 | 38406.03753 | 33966.91352 | 37113.999 |  |
| Orotic acid                 | 1357033.235 | 1288999.51  | 1264655.729 | 1213033.783 | 3928868.695 | 3044701.066 | 821487.6609 | 5988647.939 | 95090.7466  | 4310886.6 |  |
| Dibutylphthalate            | 737726.0829 | 634855.5193 | 854731.7923 | 407332.1902 | 689214.8338 | 670713.8194 | 416856.1337 | 564906.288  | 811771.9979 | 720904.4  |  |
| label                       | Control     | Control     | Control     | QC          | QC          | QC          | QC          | QC          | QC          |           |  |

|                              |             |             |             |             |             |             |             |             |             |
|------------------------------|-------------|-------------|-------------|-------------|-------------|-------------|-------------|-------------|-------------|
| Palmitic Acid                | 77898794.46 | 1869303771  | 1370193176  | 145663049.6 | 156598532.5 | 144524001.5 | 172996555.3 | 157434433.3 | 215861100.2 |
| Adenosine                    | 31893130.07 | 2028422605  | 378496699.4 | 615324397.7 | 470820676.1 | 612720657.3 | 679854177.4 | 541062431.4 | 572148839.7 |
| Isoleucine                   | 145218653.3 | 1600192647  | 523835631.9 | 889171954.4 | 886981015.9 | 870616911   | 448251685.5 | 723345707.8 | 787506163   |
| Olanzapine-1                 | 2768647.205 | 961300.9856 | 1621784596  | 35494043.47 | 32279015.93 | 32546649.16 | 26686669.42 | 28169208.24 | 30183738.23 |
| Formononetin                 | 622872.1379 | 649728.9191 | 1054464.809 | 16771641.61 | 17879081.94 | 17721049.96 | 13400609.89 | 15656060.4  | 16833236.58 |
| CLOFAZIMINE                  | 216653.5922 | 289775.4446 | 10064351.47 | 1335098862  | 1482572383  | 1507384258  | 1368973875  | 1182798898  | 1518254232  |
| Olanzapine                   | 1889228.169 | 198707.5894 | 1555986390  | 35391834.17 | 31831643.09 | 31559923.54 | 25967391.69 | 27557092.19 | 29314241.28 |
| Genistein-1                  | 97175.86343 | 1287170.176 | 59978.14886 | 89831254.4  | 86902818.1  | 113221445.9 | 77722856.18 | 77281555.07 | 82752499.01 |
| L-(+)-Lactic acid            | 32352072.21 | 394550519.7 | 45962601.83 | 95405786.28 | 89859710.4  | 107635403.4 | 67946486.62 | 87137944.41 | 118545279.1 |
| L-Glutamic acid-1            | 139319653.1 | 240653686.8 | 268603058.1 | 320443293.6 | 311373946.3 | 317146661.1 | 284138627   | 288413004.4 | 277553567.7 |
| D-(+)-Proline                | 99754138.82 | 306622108.5 | 45135381.17 | 184541876.7 | 222262450.8 | 160195210.1 | 160584769.9 | 187521812   | 195981212.1 |
| Choline monomethyl phosphate | 42137870.95 | 194541295.6 | 166451711.9 | 171413358.6 | 192491605.6 | 209875458.2 | 199073251.8 | 194810947.3 | 169784306.4 |
| N-Undecanoylglycine          | 52559121.12 | 730806455.8 | 315471053.1 | 260466080.9 | 262916356.9 | 263925220.6 | 234662962.6 | 239096792.8 | 257719120.2 |
|                              | 61581510.71 | 62278870.08 | 62785737.06 | 211890348.3 | 212364861.3 | 213587347.4 | 152808130.2 | 169598918.2 | 160041916.5 |

|                                                       |             |             |             |             |             |             |             |             |             |
|-------------------------------------------------------|-------------|-------------|-------------|-------------|-------------|-------------|-------------|-------------|-------------|
| DL-<br>Citrulline-1                                   | 48219376.21 | 130737048.8 | 35437823.61 | 67129003.55 | 82474842.86 | 91627974.1  | 68863861.2  | 69276899.76 | 75582463.16 |
| Chlorpromazine<br>sphinganine                         | 164528.8475 | 540501.9544 | 196587.5364 | 3268049.568 | 3385011.648 | 3821483.193 | 3285831.686 | 3001680.112 | 3985487.797 |
| DL-Malic acid                                         | 8435895.857 | 271943342.4 | 355560259.9 | 192273944.8 | 206375670   | 224521898.8 | 152096846.2 | 156312608.3 | 180537695.2 |
| Hypoxanthine                                          | 1525065.33  | 218849625.4 | 514527141.8 | 85982391.69 | 95969882.3  | 105167045.5 | 85980714.32 | 91367459.85 | 102077356.4 |
| Creatine<br>Trifluoroacetic acid                      | 20606661.97 | 411037688.7 | 196569400   | 245220197.1 | 256177802   | 320980284.8 | 256862042.2 | 290212723.2 | 303517022.6 |
| L-<br>Glutamic acid-2<br>methadone-d9<br>Amide<br>C18 | 285871532   | 430653292.1 | 490533282.7 | 411731294.7 | 401421927.3 | 421896816.2 | 409042586.1 | 426447479.5 | 416763940.5 |
| Spermidine-1<br>Genistein                             | 39222183.19 | 234110540.9 | 147444597   | 143786049.7 | 191234894.5 | 230864008.4 | 93265963.84 | 119631990.2 | 159455397.8 |
| Diisobutylphthalate                                   | 208528500.3 | 385590040.8 | 432323829.6 | 360986530.5 | 366272477.3 | 374561632.2 | 344415540.2 | 358666488.5 | 343638309   |
| DL-<br>Carnitine                                      | 15951335.23 | 156947117.6 | 48702047.47 | 104440180.1 | 109186763.9 | 64619417.79 | 96921897.06 | 86235023.73 | 90106243.22 |
|                                                       | 45231124.98 | 53037701.87 | 191122611.4 | 103394148.7 | 101645976.3 | 104015392   | 61958077.97 | 71066527.32 | 97970674.88 |
|                                                       | 32011.49375 | 161631.6977 | 33148.71773 | 31026235.13 | 32924922.22 | 32930741.2  | 22181567.84 | 25552209.76 | 28469162.69 |
|                                                       | 93466575.07 | 378520050.9 | 336336457.8 | 218983679.4 | 237343141.3 | 221838298.6 | 139066473.9 | 155977096.9 | 174373509   |
|                                                       | 25165633.13 | 202050045.5 | 86844816.93 | 120288984.1 | 84964948.53 | 115946073.4 | 65011991.58 | 84826000.09 | 107338527.3 |

|                       |             |             |             |             |             |             |             |             |             |
|-----------------------|-------------|-------------|-------------|-------------|-------------|-------------|-------------|-------------|-------------|
| spermidine            | 35985581.47 | 47561965.29 | 164501252.2 | 88635598.9  | 87670401.9  | 90227457.51 | 54947428.72 | 62485760.61 | 85713658.95 |
| D-Sphingosine         | 6558247.998 | 247450074   | 76995197.86 | 57433275.68 | 61062699.35 | 63996274.61 | 50443461.94 | 65606990.37 | 75058103.75 |
| D-(-)-Glutamine       | 25714785.52 | 24476292.79 | 51152161.35 | 62283287.56 | 62565064.64 | 77198639.69 | 64979882.87 | 64356132.8  | 59963396.49 |
| L-Phenylalanine       | 17805243.09 | 176139272.9 | 149600917.7 | 190324779.4 | 199075216.9 | 197683343.5 | 151969176.1 | 167716271.5 | 179164781.3 |
| L-Pyroglutamic acid   | 23917681.1  | 30188841.43 | 40082884.46 | 48167013.2  | 48296799.02 | 54297088.86 | 49322285.32 | 46591186.18 | 44962239.37 |
| S-Allyl-L-cysteine    | 5681229.951 | 99987895.21 | 7578398.829 | 37417699.44 | 39252342.78 | 39763875.52 | 27454533.54 | 25689841.33 | 26553919.68 |
| Cinnamyl alcohol      | 94784329.86 | 125336010.6 | 11762658.96 | 47326807.96 | 49607922.45 | 45059243.3  | 38076883.96 | 31440110.49 | 29108940.98 |
| Taurine-1             | 58532905.18 | 74003614.68 | 51521089.6  | 72031510.28 | 66725482.76 | 67826706.5  | 82285018.84 | 65492311.94 | 76817280.81 |
| Thiamine              | 36432374.42 | 121626640.5 | 82814519.7  | 93106885.54 | 89547363.43 | 114825918.6 | 66658980.83 | 67561123.13 | 72487140.61 |
| Erythrose-4-phosphate | 4697367.928 | 55056922.6  | 32579883.35 | 39738170.33 | 37967384.94 | 39709092.81 | 33225392.69 | 34438961.91 | 35820090.02 |
| L-Glutamic acid       | 13746989.8  | 90223108.2  | 82348437.29 | 108171686.5 | 84694627.38 | 85521813.4  | 100559346.3 | 91815159.49 | 86585748.16 |
| Pantothenic acid      | 3077108.173 | 47451339.74 | 38010332.29 | 39340307.71 | 39419988.86 | 37999651.62 | 27630567.16 | 29345709.94 | 32094613.21 |

|                                  |             |             |             |             |             |             |             |             |             |
|----------------------------------|-------------|-------------|-------------|-------------|-------------|-------------|-------------|-------------|-------------|
| Misopros<br>tol                  | 1818444.933 | 2620695.101 | 3184038.664 | 5377189.938 | 6550855.936 | 6134487.109 | 6310587.003 | 4917685.121 | 6431492.84  |
| Ac-Ala-<br>OH                    | 32082027.03 | 51990923.72 | 27180921.89 | 31133577.69 | 33591061.97 | 38522584.44 | 30826236.61 | 32022380.46 | 33389310.13 |
| Hexitol                          | 41709665.2  | 35514558.42 | 13703309.32 | 29138630.36 | 30170139.12 | 22758789.18 | 29005049.97 | 21221583.48 | 33726615.85 |
| Taurine                          | 9525171.021 | 74125747.89 | 52417214.04 | 62124841.32 | 65434332.98 | 66403812.28 | 33172276.27 | 55614496.33 | 64780204.6  |
| L-<br>Glutamin<br>e              | 11820019.59 | 8560095.211 | 19155162.76 | 28064832.04 | 28211009.41 | 34423504.9  | 33410061.98 | 28886581.52 | 24864911.76 |
| DL-<br>Citrulli<br>ne-2          | 8054078.413 | 28252170.68 | 9000224.357 | 19148205.94 | 15710245.22 | 20609572.44 | 13595684.97 | 16031091.67 | 17222752.92 |
| Creatini<br>ne<br>6-             | 12074240.78 | 49854777.49 | 31548862.57 | 26985921.29 | 30414037.14 | 37658317.99 | 29464095.85 | 48489600.81 | 37888270.08 |
| Oxohexan<br>oic acid             | 1033314.158 | 35241598.07 | 2872220.507 | 10757946.55 | 12087019.95 | 13284191.23 | 7044232.347 | 9618671.286 | 10234944.55 |
| Estazola<br>m                    | 9119235.875 | 1943449.76  | 1659967.512 | 8058462.194 | 8077650.094 | 7223186.944 | 9136426.249 | 8900560.558 | 8762694.069 |
| Indole-<br>3-<br>acrylic<br>acid | 2390733.4   | 48427141.45 | 45383916.18 | 65486313.27 | 63159664.06 | 67239227    | 46252478.85 | 52003596.54 | 56463045.87 |
| Pyrophos<br>phoric<br>Acid       | 32334431.25 | 4836540.215 | 54589365.66 | 85770096.94 | 73382394.64 | 88650237.84 | 76002857    | 78160125.75 | 88159282.45 |
| Caprolac<br>tam-1                | 32392778.1  | 69572712.82 | 44870827.04 | 57653507.98 | 57953130.65 | 66177441.17 | 59453719.93 | 60453410.9  | 69497763.2  |
| L-(+)-<br>Aspartic<br>acid       | 17076875.03 | 44356508.19 | 17117977.79 | 26207982.25 | 27396367.46 | 28560473.35 | 28533095.03 | 25724671.24 | 30476775.02 |
| Ketotife<br>n                    | 607962.4383 | 727193.667  | 894888.3511 | 2514685.927 | 1961051.76  | 1980395.585 | 1919314.976 | 2065793.439 | 3013184.909 |

|                                                             |             |             |             |             |             |             |             |             |             |
|-------------------------------------------------------------|-------------|-------------|-------------|-------------|-------------|-------------|-------------|-------------|-------------|
| D-<br>Mannose<br>6-<br>phosphat<br>e                        | 14064593.7  | 76098245.52 | 25149169.56 | 44112203.49 | 36801386.48 | 45319478.88 | 40979245.34 | 30323763.11 | 41273989.1  |
| L-(-)-<br>Methioni<br>ne-1                                  | 6799319.622 | 74040101.41 | 39928006.27 | 58741950.03 | 51421406.07 | 63130086.97 | 49761240.25 | 52352302.43 | 51360795.15 |
| L-(-)-<br>Asparagi<br>ne-1                                  | 23007831.44 | 21748818.91 | 8179722.441 | 20269101.55 | 15427675.22 | 20510123.09 | 21552457.16 | 20258514.21 | 17885290.46 |
| L-(-)-<br>methioni<br>ne-2                                  | 5898472.839 | 62300879.75 | 32567887.82 | 48919094.77 | 42353469.08 | 53172792.57 | 43569204.28 | 45057553.07 | 42428182.4  |
| Mycophen<br>olic<br>acid<br>ribulose<br>5-<br>phosphat<br>e | 829525.2957 | 1000554.481 | 1015092.48  | 3869220.599 | 3999358.339 | 3934374.28  | 2707369.194 | 2889741.491 | 2900429.668 |
| g-<br>Butyrobe<br>taine<br>(9Z)-9-                          | 9030009.337 | 56015333.62 | 19584320.07 | 40538173.69 | 36712963.38 | 33878977.02 | 32740773.9  | 29565851.09 | 36730646.97 |
| Octadec<br>namide                                           | 2690788.971 | 63525066.97 | 18939745.3  | 14085843.64 | 14527713.62 | 17244391.41 | 14063296.52 | 17851265.43 | 18906230.86 |
| Hypotaur<br>ine                                             | 10847259.79 | 30881291.62 | 4398323.065 | 18457527.36 | 24355366.82 | 18165740.23 | 16428107.95 | 18252124.15 | 12567879.4  |
| Arabinos<br>ylhypoxa<br>nthine                              | 640107.2344 | 21756045.51 | 15791193.42 | 9231249.034 | 7142324.909 | 7764724.959 | 7357516.235 | 7177188.36  | 7123806.41  |



|                                  |             |             |             |             |             |             |             |             |             |
|----------------------------------|-------------|-------------|-------------|-------------|-------------|-------------|-------------|-------------|-------------|
| gamma-<br>Aminobutyric<br>acid   | 5590167.691 | 12626045.61 | 5999123.688 | 17474666.59 | 14367772.91 | 16565019.27 | 13146359.82 | 13477033.81 | 13659799.54 |
| DL-<br>Citruilline               | 1322284.427 | 18825303.4  | 4421515.398 | 8220992.542 | 9102797.914 | 9967204.385 | 7625230.768 | 8684907.337 | 10079501.33 |
| Sulfamic<br>acid                 | 11786618.59 | 3652419.281 | 2520324.44  | 11708463.25 | 10445810.5  | 10134279.75 | 10703815.85 | 10963036.6  | 13753964.57 |
| Methionine<br>sulfoxide          | 11772954.84 | 26469873.88 | 6677597.956 | 15456458.88 | 17642571.89 | 15663085.43 | 17394972.55 | 15436233.5  | 15645875.2  |
| DL-<br>Arginine                  | 10255238.56 | 2603386.994 | 3770080.181 | 10626564.91 | 12176173.9  | 11892941.45 | 8388147.863 | 8914224.118 | 9008238.95  |
| Methylmalonic<br>acid            | 1176198.984 | 7742981.247 | 1162138.202 | 3251119.48  | 1795188.569 | 3482046.137 | 3907281.285 | 3364388.531 | 3995458.759 |
| Adenosine 5'-<br>monophosphate-1 | 6430053.884 | 4391513.592 | 5956420.344 | 14830225.53 | 14718321.91 | 16202504.61 | 12557907.86 | 11437009.02 | 12987857.43 |
| N-<br>Acetylaspartic<br>acid     | 3427419.446 | 49687388.28 | 26964969.23 | 22034931.98 | 26105039.17 | 29524378.23 | 18165935.19 | 23434144.09 | 23085084.01 |
| Hippuric<br>acid                 | 421533.4541 | 5181176.172 | 2183351.14  | 2607772.785 | 2536322.439 | 2610952.133 | 3510396.898 | 3939973.423 | 3713600.648 |
| Nicotinamide                     | 4095267.31  | 17993475.33 | 5777390.6   | 20522307.31 | 22767188.07 | 16328240.32 | 14435265.04 | 16381466.58 | 21521140.58 |

|                                         |             |             |             |             |             |             |             |             |             |
|-----------------------------------------|-------------|-------------|-------------|-------------|-------------|-------------|-------------|-------------|-------------|
| Glycerol<br>3-<br>phosphat<br>e         | 4965837.565 | 29995160.86 | 15456773.09 | 17215017.67 | 17054038.15 | 18832028.23 | 16500155.2  | 19335035.39 | 18060364.27 |
| noradren<br>aline                       | 904553.171  | 8367933.539 | 5086257.778 | 3445502.913 | 4165466.126 | 5569777.039 | 3317458.424 | 3258847.859 | 4039798.725 |
| Dihydr<br>ot<br>hymine<br>(E)-p-        | 7002058.717 | 19366851.82 | 3758524.682 | 9924222.071 | 9236079.933 | 8083913.393 | 8110177.244 | 6711988.687 | 9155800.235 |
| coumaric<br>acid                        | 7974198.082 | 23085665.71 | 4902007.412 | 15955489.87 | 20167795.6  | 18894445.63 | 13117096.84 | 17695499.16 | 18137535.76 |
| propiony<br>lcarniti<br>ne              | 746974.3531 | 17197712.33 | 5043444.496 | 8829667.79  | 7505311.063 | 9995172.282 | 8140077.079 | 10971335.97 | 6643353.677 |
| Fomepizo<br>le                          | 4342832.896 | 6735623.786 | 6014084.321 | 4730608.138 | 4098621.95  | 7067090.437 | 5778223.885 | 5120248.542 | 5425582.498 |
| Flavin<br>mononucl<br>eotide            | 4606347.508 | 7084013.108 | 5015116.153 | 8585483.313 | 9162086.667 | 10420925.18 | 7768919.29  | 9605251.861 | 8263737.164 |
| N-<br>Acetyl-<br>L-<br>aspartic<br>acid | 282402.8558 | 32632285.7  | 11797795.4  | 12125138.06 | 12305738.31 | 12732388.39 | 7429686.29  | 8102349.86  | 9375333.037 |
| L-<br>Hydroxyp<br>roline                | 3582727.399 | 26942622.57 | 5573433.038 | 12297272.44 | 14557285.71 | 12748654.05 | 10681591.02 | 14396866.61 | 12836623.13 |
| L-(-)-<br>Threonin<br>e                 | 4502034.836 | 5370863.517 | 3298753.46  | 6989155.385 | 9013481.528 | 8904162.992 | 8774175.751 | 8614919.472 | 8538728.161 |

|                                      |             |             |             |             |             |             |             |             |             |
|--------------------------------------|-------------|-------------|-------------|-------------|-------------|-------------|-------------|-------------|-------------|
| 6-<br>methylte<br>trahydro<br>pterin | 81556.73678 | 12089932.16 | 29112335.77 | 4465269.895 | 5779382.484 | 6185323.502 | 5197658.55  | 5409980.612 | 6526392.752 |
| L-(-)-<br>Asparagi<br>ne             | 6729335.842 | 15419459    | 2949058.948 | 9974416.543 | 9699112.209 | 10368174.18 | 6049916.749 | 8511331.091 | 7087207.567 |
| DL-<br>Glutamin<br>e                 | 639477.9813 | 2169520.455 | 11075713.6  | 10387748.32 | 12533527.01 | 12360605.14 | 8947067.674 | 12029331.07 | 13184877.26 |
| DL-<br>Histidin<br>e                 | 849449.6335 | 16953754.93 | 1907000.924 | 2791009.849 | 2666433.908 | 3538514.612 | 2038800.146 | 2727283.566 | 2715238.724 |
| g-<br>Glutamyl<br>cysteine<br>l-     | 260061.0734 | 4072533.974 | 2963149.718 | 6774245.271 | 6419947.844 | 6526819.256 | 4367810.335 | 5030044.231 | 5984918.382 |
| Histidin<br>al                       | 4138015.209 | 15245203.73 | 13782134.15 | 12969975.6  | 11306111.4  | 12775949.3  | 9332582.277 | 9885047.541 | 9926797.187 |
| TROLEAND<br>OMYCIN                   | 2741679.279 | 3040313.414 | 3419378.949 | 3262485.135 | 2843143.347 | 4974313.481 | 940146.5338 | 944076.7601 | 1050484.781 |
| Cyclo(le<br>ucylprol<br>yl)          | 736183.205  | 804253.3089 | 936627.9489 | 1138871.988 | 1143881.441 | 1179401.871 | 1778878.459 | 1987191.027 | 1772788.769 |
| putresci<br>ne                       | 5160226.422 | 12482593.61 | 12515949.91 | 10011559.27 | 10207158.88 | 10814091.76 | 12307504.17 | 12901638.63 | 15578575.42 |
| N-<br>methylpr<br>oline              | 3117316.825 | 16394116.85 | 4909440.498 | 6648611.358 | 7392602.222 | 6802099.828 | 6306422.54  | 7629751.504 | 9248840.444 |
| N-<br>Tridecan<br>oylglyci<br>ne     | 2380520.904 | 2428116.036 | 1591268.923 | 6678606.776 | 6101313.82  | 6713248.022 | 6593112.192 | 6191330.142 | 6629916.236 |

|                                        |             |             |             |             |             |             |             |             |             |
|----------------------------------------|-------------|-------------|-------------|-------------|-------------|-------------|-------------|-------------|-------------|
| Adenine                                | 2451833.958 | 10613476.38 | 6360664.077 | 3556610.097 | 3677079.092 | 3973640.29  | 2844442.913 | 5438391.36  | 3269202.129 |
| L-(-)-<br>Methioni<br>ne               | 3086053.834 | 9410864.61  | 5900677.382 | 8159715.65  | 4857857.2   | 8450616.548 | 7862909.897 | 6817156.905 | 7594106.37  |
| Pregabal<br>in                         | 6218934.142 | 13536894.7  | 5944005.733 | 11385478.7  | 10389934.66 | 10428232.8  | 11517560.86 | 12712340.89 | 11162448.56 |
| 3-<br>(Sulfoox<br>y)-L-<br>tyrosine    | 2846009.257 | 11933183.91 | 4473292.943 | 9007406.002 | 13326513.53 | 10984606.64 | 8425586.965 | 9161646.25  | 9250634.836 |
| Nitrazep<br>am                         | 1652713.124 | 392647.2326 | 984194.3897 | 1094301.992 | 1445464.91  | 1272612.072 | 1587314.708 | 1374424.839 | 1240760.333 |
| .alpha.-<br>Aminoadi<br>pic acid       | 4161807.325 | 4220859.568 | 2078516.358 | 4456720.648 | 5074078.394 | 3711727.106 | 3329559.15  | 3980458.508 | 4131268.329 |
| DL-<br>Ceruleni<br>n                   | 16127292.82 | 8378158.127 | 10740996.83 | 11167607.82 | 9671710.11  | 9568220.547 | 12238347.71 | 12287612.62 | 10641376.14 |
| Pyridoxa<br>l                          | 583392.696  | 2823876.935 | 1266543.65  | 1485043.022 | 1864797.126 | 2712258.893 | 2257979.617 | 2281765.18  | 2202180.363 |
| Adenosin<br>e 5'-<br>monophos<br>phate | 2085736.924 | 769667.4391 | 884419.5673 | 3331663.673 | 2326768.047 | 2938538.996 | 2549663.034 | 2153661.488 | 2238978.468 |
| Caprolac<br>tam                        | 4370703.537 | 6838515.216 | 11055539.34 | 7448994.329 | 6275075.724 | 7735692.997 | 8099587.5   | 8128834.515 | 6565710.07  |
| Hispidul<br>in                         | 52266.07658 | 85599.69124 | 77105.23046 | 556396.7084 | 617239.1092 | 625627.3733 | 465109.8206 | 537784.7433 | 673601.7273 |
| 8-<br>hydroxy-<br>deoxygua<br>nosine   | 968939.4643 | 8013561.657 | 6329331.52  | 5537146.939 | 3642416.022 | 4242574.658 | 3565937.651 | 3647234.656 | 4188607.627 |

|                                          |             |             |             |             |             |             |             |             |             |
|------------------------------------------|-------------|-------------|-------------|-------------|-------------|-------------|-------------|-------------|-------------|
| 2S-<br>Amino-<br>tridecan<br>oic acid    | 2581329.421 | 336651.1421 | 340887.5274 | 1703828.683 | 1883516.638 | 1797489.19  | 1635015.463 | 1776599.752 | 2101551.449 |
| N-<br>Acetylne<br>uraminic<br>acid       | 1193286.94  | 800372.6443 | 1446599.315 | 2273550.509 | 1850586.554 | 3376057.181 | 3345518.864 | 3049870.928 | 2772112.65  |
| Fumaric<br>acid                          | 1025132.934 | 15074272.87 | 10203510.37 | 5333032.87  | 4893485.163 | 5102208.336 | 3382321.277 | 4013261.209 | 3926650.51  |
| acetylsp<br>ermine<br>alpha-             | 591133.7011 | 957889.5044 | 470777.6704 | 1641172.025 | 2188037.287 | 2046048.565 | 1192833.817 | 1634987.714 | 1620956.676 |
| Ketoglut<br>aric<br>acid                 | 85484.54756 | 1172487.611 | 685253.7448 | 2684320.492 | 2273058.167 | 1869875.702 | 1879866.608 | 2266298.811 | 2244647.011 |
| meglumin<br>e                            | 3293299.044 | 4821224.926 | 5637800.238 | 1385688.416 | 2132366.267 | 2083022.666 | 1591636.642 | 1198380.882 | 1448030.7   |
| N-<br>Acetyl-<br>L-<br>histidin<br>e     | 190415.3696 | 3568829.227 | 1242173.119 | 711955.8708 | 923174.1679 | 1140263.347 | 923967.0293 | 873432.4907 | 866408.8857 |
| beta-L-<br>fucose<br>1-<br>phosphat<br>e | 1575690.828 | 3119132.632 | 385638.9331 | 905532.0214 | 1063382.062 | 1195661.731 | 997345.5619 | 996553.9651 | 1229535.657 |
| Guanine<br>L-                            | 41024.56351 | 4239885.297 | 12562361.92 | 1782814.371 | 1275833.539 | 974358.1799 | 1212188.748 | 1183784.008 | 1321761.825 |
| Cysteiny<br>lglycine                     | 429140.5446 | 5464918.546 | 4893019.363 | 6652257.77  | 6624614.795 | 6824599.414 | 4640003.613 | 5242240.659 | 5712339.679 |

|                             |             |             |             |             |             |             |             |             |             |  |
|-----------------------------|-------------|-------------|-------------|-------------|-------------|-------------|-------------|-------------|-------------|--|
| D-a-                        |             |             |             |             |             |             |             |             |             |  |
| Hydroxyglutaric acid        | 294695.8509 | 1773367.229 | 4420123.735 | 2111045.414 | 2402300.283 | 2841177.774 | 1650548.199 | 2069577.433 | 1982783.271 |  |
| Adipic acid                 | 2263267.45  | 1565791.177 | 3681426.257 | 2728629.763 | 2693095.137 | 3390624.41  | 3583344.149 | 2465289.674 | 4531102.958 |  |
| Luteolin                    | 46144.22862 | 50030.89877 | 53383.17639 | 383185.1696 | 399280.7155 | 462022.1352 | 213800.6368 | 403724.9601 | 439249.4707 |  |
| Ecgonine                    | 642023.3437 | 1119320.384 | 1441181.772 | 753887.1939 | 548986.036  | 792496.9373 | 630527.7319 | 826224.7446 | 755790.1656 |  |
| Metirosine                  | 995578.0736 | 4006624.698 | 2394610.632 | 4336828.613 | 4694037.361 | 4419251.856 | 4812134.445 | 3401708.726 | 4914801.894 |  |
| 16-Hydroxyhexadecanoic acid | 316761.5137 | 1353289.439 | 563804.6033 | 1255499.549 | 1522951.75  | 2177232.263 | 1401441.887 | 1173506.202 | 1460136.093 |  |
| g-Guanidinobutyrate         | 379489.6035 | 1970242.485 | 538725.5413 | 2133975.55  | 1939354.435 | 1900098.215 | 2362816.51  | 1919909.622 | 2326720.7   |  |
| trimethadione               | 3292549.909 | 1246011.804 | 1402843.429 | 2546356.503 | 2377577.584 | 2148626.164 | 1819401.69  | 2421264.155 | 3020765.508 |  |
| acetyltaurine               | 505925.7778 | 4390447.775 | 643047.4356 | 2003283.695 | 2244612.145 | 2557582.355 | 2029688.659 | 2063872.754 | 2632244.632 |  |
| 2-Mercaptobenzothiazole     | 114726.4179 | 617182.234  | 480452.2465 | 308671.6815 | 288836.8021 | 315296.3986 | 259823.0527 | 174210.5147 | 186059.2169 |  |
| Chrysin                     | 35871.95945 | 36797.44713 | 37564.32459 | 188645.5675 | 149602.6837 | 213649.8399 | 120313.658  | 132654.81   | 180035.1857 |  |
| Orotic acid                 | 598149.1016 | 2629371.168 | 798616.0254 | 1292820.416 | 1301422.836 | 1276461.77  | 1112813.392 | 970397.3054 | 1045292.301 |  |
| Dibutylphthalate            | 566968.6393 | 734903.3847 | 579810.2965 | 953725.5771 | 789179.1237 | 576475.8083 | 631631.5388 | 554266.7652 | 612693.8276 |  |
| label                       | QC          | QC          | QC          |             |             |             |             |             |             |  |

|                                            |             |             |             |
|--------------------------------------------|-------------|-------------|-------------|
| Palmitic<br>Acid                           | 169916328.2 | 156591297.2 | 140548478.7 |
| Adenosin<br>e                              | 516305572.7 | 627328467.6 | 580428341.3 |
| Isoleuci<br>ne                             | 933480869.7 | 822369004.2 | 756095997.4 |
| Olanzapi<br>ne-1                           | 36930138.54 | 31913544.9  | 30700781.99 |
| Formnon<br>etin                            | 17269671.15 | 18560335.92 | 15191721.47 |
| CLOFAZIM<br>INE                            | 1400183540  | 1504489248  | 1349035497  |
| Olanzapi<br>ne                             | 35776379.16 | 31439214.58 | 30409399.5  |
| Genistei<br>n-1                            | 104646208.5 | 106446543.1 | 79637811.75 |
| L-(+)-<br>Lactic<br>acid                   | 129074822   | 75675197.28 | 84433008.05 |
| L-<br>Glutamic<br>acid-1                   | 316514490.4 | 302231438.5 | 323568629.9 |
| D-(+)-<br>Proline                          | 180761021.9 | 217257617.4 | 160563885.9 |
| Choline<br>monometh<br>yl<br>phosphat<br>e | 232856413.3 | 204694031.5 | 168596270.2 |
| N-<br>Undecano<br>ylglycin<br>e            | 277116457.1 | 249041447.9 | 255315409.2 |
|                                            | 245617501.6 | 171976640.5 | 213685615.2 |

|                       |             |             |             |
|-----------------------|-------------|-------------|-------------|
| DL-<br>Citrulline-1   | 88148851.24 | 81957448.13 | 71009007.37 |
| Chlorpromazine        | 3125869.699 | 3508528.92  | 3433605.352 |
| sphinganine           | 30022329.99 | 23262468.59 | 24665963.21 |
| DL-Malic acid         | 232536344.8 | 197715853.8 | 182581181.7 |
| Hypoxanthine          | 92219119.01 | 99086885.3  | 89400164.89 |
| Creatine              | 309941770.4 | 265161752.5 | 254385304.5 |
| Trifluoroacetic acid  | 424678518.5 | 401832985.4 | 411307100.6 |
| L-<br>Glutamic acid-2 | 129281610.8 | 153255469.3 | 146623914.1 |
| methadone-d9          | 359666346.6 | 363114895.4 | 370456095.3 |
| Amide<br>C18          | 110039601.8 | 93839977.31 | 86656316.4  |
| Spermidine-1          | 111614346.7 | 94184448.21 | 90317499.04 |
| Genistein             | 29034746.03 | 31532814.67 | 32238291.08 |
| Diisobutylphthalate   | 267043731.9 | 207067110.6 | 201172309.9 |
| DL-<br>Carnitine      | 122754347.3 | 86878021.05 | 96754474.1  |



|                       |             |             |             |
|-----------------------|-------------|-------------|-------------|
| spermidine            | 99008235.84 | 81015984.78 | 76894383.63 |
| D-Sphingosine         | 64479101.86 | 61612884.96 | 53867413.47 |
| D-(-)-Glutamine       | 68800675.58 | 73956135.39 | 61892793.81 |
| L-Phenylalanine       | 211199680.3 | 186206662.4 | 181001128.9 |
| L-Pyroglutamic acid   | 48299495.91 | 56656063.9  | 46988044.74 |
| S-Allyl-L-cysteine    | 44466082.82 | 37415966.21 | 32533010.68 |
| Cinnamyl alcohol      | 42094052.54 | 47300109.65 | 54955874.09 |
| Taurine-1             | 71249178.94 | 68917887.72 | 68526482.27 |
| Thiamine              | 106299074.5 | 92654950.39 | 89956479.19 |
| Erythrose-4-phosphate | 41124892.33 | 37391782.17 | 38119331.77 |
| L-Glutamic acid       | 97582038.61 | 93475297.05 | 94389858.21 |
| Pantothenic acid      | 38986191.24 | 37843238.02 | 36375070.42 |

|                                  |             |             |             |
|----------------------------------|-------------|-------------|-------------|
| Misopros<br>tol                  | 4594017.182 | 6559327.803 | 6098436.554 |
| Ac-Ala-<br>OH                    | 34951828.33 | 35587362.97 | 31888421.57 |
| Hexitol                          | 27295267.38 | 24622010.74 | 28425954.16 |
| Taurine                          | 61748557.89 | 54878662.24 | 62323087.67 |
| L-<br>Glutamin<br>e              | 31584083.64 | 33161836.01 | 29297959.42 |
| DL-<br>Citrulli<br>ne-2          | 21220165.75 | 11112144.24 | 17309429.92 |
| Creatini<br>ne<br>6-             | 42909155.71 | 26551544.77 | 29574406.25 |
| Oxohexan<br>oic acid             | 14916676.96 | 8654625.85  | 11503440.53 |
| Estazola<br>m                    | 7301758.784 | 7640338.808 | 8448662.722 |
| Indole-<br>3-<br>acrylic<br>acid | 72298446.08 | 60891528.7  | 59110609.87 |
| Pyrophos<br>phoric<br>Acid       | 70292123.16 | 77760425.57 | 90268904.57 |
| Caprolac<br>tam-1<br>L-(+)-      | 71899927.72 | 57382944.4  | 56045109.02 |
| Aspartic<br>acid                 | 25043795.11 | 28595271.05 | 27189844.02 |
| Ketotife<br>n                    | 2417888.415 | 1925349.117 | 1919179.747 |

|                                                             |             |             |             |
|-------------------------------------------------------------|-------------|-------------|-------------|
| D-<br>Mannose<br>6-<br>phosphat<br>e                        | 39509979.72 | 41647237.15 | 42748165.16 |
| L-(-)-<br>Methioni<br>ne-1                                  | 59091462.88 | 56647097.17 | 55491908.77 |
| L-(-)-<br>Asparagi<br>ne-1                                  | 20169631.36 | 21802533.3  | 16813072.83 |
| L-(-)-<br>methioni<br>ne-2                                  | 50902792.29 | 47226771.55 | 46464482.7  |
| Mycophen<br>olic<br>acid<br>ribulose<br>5-<br>phosphat<br>e | 3695257.536 | 3446397.013 | 4066345.587 |
| g-<br>Butyrobe<br>taine<br>(9Z)-9-                          | 37392418.45 | 35199441.67 | 36494786.4  |
| Octadece<br>namide                                          | 17233997.64 | 18410883.82 | 12103772.59 |
| Hypotaur<br>ine                                             | 24691833.72 | 18848626.08 | 19358210.75 |
| Arabinos<br>ylhypoxa<br>nthine                              | 7266575.648 | 8047561.551 | 8159573.07  |

|                                          |             |             |             |
|------------------------------------------|-------------|-------------|-------------|
| gamma-<br>Aminobut<br>yric<br>acid       | 14348948.32 | 21422275.06 | 12408517.46 |
| DL-<br>Citrulli<br>ne                    | 9907591.1   | 10076089.94 | 7854568.525 |
| Sulfamic<br>acid                         | 10532348.44 | 10053075.27 | 10604552.02 |
| Methioni<br>ne<br>sulfoxid<br>e          | 19961486.42 | 16283721.14 | 14831131.75 |
| DL-<br>Arginine                          | 10829152.08 | 10869942.01 | 10829185.81 |
| Methylma<br>lonic<br>acid                | 3479253.138 | 2793373.54  | 2930579.81  |
| Adenosin<br>e 5'-<br>monophos<br>phate-1 | 14144061.32 | 17679552.39 | 13284984.99 |
| N-<br>Acetylas<br>partic<br>acid         | 27538770.91 | 25310295.33 | 23078158.47 |
| Hippuric<br>acid                         | 3295630.93  | 2318362.257 | 2742121.228 |
| Nicotina<br>mide                         | 26135848.12 | 14190203.21 | 18664864.23 |

|                                                |             |             |             |
|------------------------------------------------|-------------|-------------|-------------|
| Glycerol<br>3-<br>phosphat<br>e                | 15841582.26 | 15894535.77 | 19687857.49 |
| noradren<br>aline                              | 4976494.307 | 4365836.824 | 3687435.874 |
| Dihydrot<br>hymine<br>(E)-p-                   | 9398224.196 | 9837787.792 | 7869973.693 |
| coumaric<br>acid<br>propiony<br>lcarniti<br>ne | 17997119.89 | 18882636.65 | 16172987.31 |
| Fomepizo<br>le                                 | 7261340.635 | 10570268.89 | 8415286.646 |
| Flavin<br>mononucl<br>eotide                   | 6220118.059 | 4539433.99  | 5465498.043 |
| N-<br>Acetyl-<br>L-<br>aspartic<br>acid        | 10766793.76 | 9261803.79  | 8491068.793 |
| L-<br>Hydroxyp<br>roline                       | 15354499.14 | 11507397.01 | 11386616.46 |
| L-(-)-<br>Threonin<br>e                        | 12279277.35 | 12391496.55 | 13464845.3  |
|                                                | 8041714.139 | 8194338.019 | 8561720.225 |

|                                                     |             |             |             |
|-----------------------------------------------------|-------------|-------------|-------------|
| 6-<br>methylte<br>trahydro<br>pterin<br>L-(-)-      | 5533889.661 | 4760398.935 | 5485887.977 |
| Asparagi<br>ne<br>DL-                               | 10914440.48 | 7553417.667 | 9974366.298 |
| Glutamin<br>e<br>DL-                                | 12672925.32 | 12352186.12 | 9678230.644 |
| Histidin<br>e<br>g-                                 | 3404589.162 | 2826530.305 | 2597376.886 |
| Glutamyl<br>cysteine<br>l-                          | 6741581.514 | 5985825.714 | 6150763.545 |
| Histidin<br>al<br>TROLEAND<br>OMYCIN                | 12597328.32 | 11946443.85 | 11901488.76 |
| Cyclo(le<br>ucylprol<br>yl)<br>putresci<br>ne<br>N- | 8541249.534 | 3972919.429 | 3412404.124 |
| methylpr<br>oline<br>N-                             | 1559750.48  | 1559619.518 | 1113925.984 |
| Tridecan<br>oylglyci<br>ne                          | 11717783.29 | 10297519.95 | 9334805.242 |
|                                                     | 6885975.704 | 6134229.411 | 6979214.61  |
|                                                     | 7201224.444 | 6471682.604 | 6178414.321 |

|                |             |             |             |
|----------------|-------------|-------------|-------------|
| Adenine        | 3248924.167 | 4329664.29  | 3418046.921 |
| L-(-)-         |             |             |             |
| Methionine     | 8871128.148 | 8194494.74  | 5664498.229 |
| Pregabalin     | 11996656.06 | 10652751.24 | 10611764.29 |
| 3-             |             |             |             |
| (Sulfoox-      |             |             |             |
| y)-L-          | 10988462.36 | 10449051.31 | 10964339.46 |
| tyrosine       |             |             |             |
| Nitrazepam     | 1413287.969 | 1534839.764 | 1127574.661 |
| .alpha.-       |             |             |             |
| Aminoadi-      | 4952139.581 | 4117073.018 | 4025256.314 |
| pic acid       |             |             |             |
| DL-            |             |             |             |
| Ceruleni-      | 9678583.069 | 10317828.73 | 11001879.18 |
| n              |             |             |             |
| Pyridoxal      | 2441037.648 | 2183003.554 | 1835361.071 |
| Adenosine      |             |             |             |
| 5'-            |             |             |             |
| monophosphate  | 2594293.091 | 3407625.627 | 2475713.178 |
| Caprolactam    | 6753445.66  | 7382323.363 | 7693514.906 |
| Hispidulin     | 482034.6834 | 501918.2086 | 670338.2871 |
| 8-             |             |             |             |
| hydroxy-       |             |             |             |
| deoxyguanosine | 4593424.816 | 5163572.551 | 3574899.5   |

|                                          |             |             |             |
|------------------------------------------|-------------|-------------|-------------|
| 2S-<br>Amino-<br>tridecan<br>oic acid    | 1672943.153 | 1595393.386 | 1883996.846 |
| N-<br>Acetylne<br>uraminic<br>acid       | 2490107.147 | 1862509.524 | 2345586.071 |
| Fumaric<br>acid                          | 6017402.142 | 4366061.744 | 4799538.694 |
| acetylsp<br>ermine<br>alpha-             | 2227941.277 | 1968819.376 | 1585219.037 |
| Ketoglut<br>aric<br>acid                 | 2633005.127 | 2269463.629 | 1995361.697 |
| meglumin<br>e                            | 2569430.422 | 1697403.053 | 1663719.587 |
| N-<br>Acetyl-<br>L-<br>histidin<br>e     | 1057761.54  | 657101.8143 | 1055874.578 |
| beta-L-<br>fucose<br>1-<br>phosphat<br>e | 1079579.832 | 1094441.869 | 930935.3653 |
| Guanine                                  | 1218560.528 | 1321698.383 | 1397043.018 |
| L-<br>Cysteiny<br>lglycine               | 6225030.901 | 6793853.415 | 6241247.972 |



|                                         |             |             |             |
|-----------------------------------------|-------------|-------------|-------------|
| D-a-<br>Hydroxyg<br>lutaric<br>acid     | 2594592.737 | 2235110.459 | 2304535.832 |
| Adipic<br>acid                          | 3462545.981 | 2789543.643 | 2699085.378 |
| Luteolin                                | 393301.5363 | 313285.7715 | 430920.7086 |
| Ecgonine                                | 772632.5381 | 670561.2029 | 660462.5295 |
| Metirosi<br>ne                          | 4436781.666 | 4544287.074 | 4398130.6   |
| 16-<br>Hydroxyh<br>exadecan<br>oic acid | 1688178.847 | 1269739.335 | 1860334.372 |
| g-<br>Guanidin<br>obutyra<br>te         | 2371031.691 | 2199629.277 | 1750287.676 |
| trimetha<br>dione                       | 2044018.833 | 2193121.677 | 2597599     |
| acetylt<br>urine                        | 2280515.755 | 2215042.669 | 2119669.535 |
| 2-<br>Mercapto<br>benzothi<br>azole     | 322816.2708 | 316557.1901 | 318182.4291 |
| Chrysin                                 | 189562.7303 | 137371.7344 | 206076.6059 |
| Orotic<br>acid                          | 1453932.948 | 1385772.896 | 1074653.428 |
| Dibutyl<br>phthalat<br>e                | 815595.3471 | 702280.8343 | 801477.5957 |

Table S 2. Targeted-proteins of baicalein

| names    | names   | names   | names           | names     | names   |
|----------|---------|---------|-----------------|-----------|---------|
| ABO      | FHIT    | PCK1    | CCL24           | IMPDH2    | SRC     |
| ACE      | FKBP1A  | PCMT1   | CCL5            | INSR      | SRR     |
| ACPP     | FKBP1B  | PCP4    | CCNA2           | ISG20     | STAT1   |
| ADAM33   | FKBP3   | PDE3B   | CCNT1           | ITK       | SULT1A1 |
| ADAMTS17 | FNTA    | PDE4B   | CD1A            | ITPKA     | SULT1E1 |
| ADH1C    | FOLH1   | PDE4D   | CD209           | IVD       | SULT2A1 |
| ADH5     | GALE    | PDE5A   | CDC42           | JAK2      | SULT2B1 |
| ADK      | GALK1   | PDPK1   | CDK2            | JAK3      | SYK     |
| AGXT     | GART    | PGF     | CDK5R1          | KAT2B     | TAP1    |
| AHCY     | GBA     | PGR     | CDK6            | KDR       | TEK     |
| AK1      | GLO1    | PITPNA  | CDK7            | KIF11     | TGFB2   |
| AKR1B1   | GM2A    | PKIA    | CES1            | KIT       | TGFBR1  |
| AKR1C1   | GMPR    | PLA2G2A | CHEK1           | LGALS2    | TGFBR2  |
| AKR1C3   | GMPR2   | PLAU    | CHIT1           | LGALS3    | TGM3    |
| AKT1     | GNPDA2  | PNMT    | CLEC4M          | LSS       | THRA    |
| AKT2     | GP1BA   | PNP     | CLK1            | LTA4H     | THRB    |
| ALB      | GPI     | PPARA   | CMA1            | LYZ       | TK1     |
| ALDH2    | GSK3B   | PPARG   | CRABP2          | MAN1B1    | TNK2    |
| ALDOA    | GSR     | PPCDC   | CRAT            | MAOA      | TPH1    |
| AMD1     | GSTA1   | PPIA    | CSNK1G2         | MAOB      | TPSB2   |
| AMY1B    | GSTA3   | PRKCQ   | CTNNA1          | MAP2K1    | TREM1   |
| AMY1B    | GSTM1   | PTPN1   | CTSB            | MAPK10    | TTPA    |
| AMY2A    | GSTM2   | PYGL    | CTSF            | MAPK14    | TTR     |
| ANG      | GSTO1   | RAB11A  | CTSG            | MAPKAPK2  | TYMS    |
| APAF1    | GSTP1   | RAB5A   | CTSK            | ME2       | UAP1    |
| APRT     | GSTT2B  | RAC1    | CTSS            | MET       | UCK2    |
| AR       | GSTZ1   | RAN     | CYP2C9          | METAP1    | UMPS    |
| ARG1     | HADH    | RAP2A   | DAPK1           | METAP2    | VDR     |
| ARG2     | HAGH    | REG1A   | DCK             | MIF       | XIAP    |
| ARHGAP1  | HCK     | REN     | DCPS            | MME       | ZAP70   |
| ARL5A    | HDAC8   | RFK     | DCXR            | MMP1      | PARP1   |
| ARL5B    | HEXB    | RHOA    | DHFR            | MMP12     | IGF2    |
| ARSA     | HINT1   | RNASE2  | DHODH           | MMP13     | CYCS    |
| ATIC     | HK1     | RNASE3  | DPEP1           | MMP16     | ALOX12  |
| AURKA    | HMGCR   | RNASEL  | DPP4            | MMP3      | PTGS1   |
| BACE1    | HMOX1   | RND3    | DTYMK           | MMP7      | TDRD7   |
| BAG1     | HNMT    | RORA    | DUT             | MMP8      | PTGS2   |
| BCAT2    | HPGDS   | RXRA    | EEA1            | MMP9      | CDK1    |
| BHMT     | HPRT1   | RXRB    | EGFR            | MTAP      | CCNB1   |
| BIRC7    | HRAS    | SEC14L2 | EIF4E           | MTHFD1    | MPO     |
| BST1     | HSD11B1 | SELE    | ELANE           | NME1-NME2 | PDE3A   |
| BTK      | HSD17B1 | SELP    | ENSG00000259288 | NMNAT1    | PRSS1   |

|       |          |          |       |        |        |
|-------|----------|----------|-------|--------|--------|
| CA1   | HSP90AA1 | SERPINA1 | ERBB4 | NMNAT3 | NCOA2  |
| CA12  | HSP90AB1 | SHBG     | ERI1  | NOS2   | NCOA1  |
| CA2   | HSPA8    | SHMT1    | ESR1  | NQO1   | CALM2  |
| CASP1 | IGF1R    | SOD2     | ESR2  | NR1H2  | RELA   |
| CASP3 | IL2      | SORD     | ESRRG | NR1H4  | AHR    |
| CBR1  | IMPA2    | SPARC    | F10   | NR1I2  | BCL2   |
| CCBL1 | IMPDH1   | SPR      | F11   | NR3C1  | FOS    |
| FABP6 | NUDT9    | TP53     | F2    | NR3C2  | BAX    |
| FECH  | OAT      | HIF1A    | F7    | NSUN2  | NFATC1 |
| FGFR1 | OTC      | FOSL1    | FABP3 | NT5M   | EGLN1  |
| FGG   | PAH      | FOSL2    | NOX5  | FABP5  | APOD   |

Table S 3. Glycolysis-related genes

| names   | names  | names     | names   | names  | names     |
|---------|--------|-----------|---------|--------|-----------|
| GSME    | ME1    | LDHC      | DSC2    | STMN1  | ACOT12    |
| ABCB6   | ME2    | PGAM4     | ECD     | TFF3   | ACSS1     |
| ADORA2B | MED24  | PGK2      | EFNA3   | TGFA   | ACSS2     |
| AGL     | MERTK  | PGM1      | EGFR    | TGFBI  | BRP44     |
| AGRN    | MET    | ENO3      | EGLN3   | TKTL1  | BRP44L    |
| AK3     | MIF    | GAPDHS    | ELF3    | TPBG   | DLAT      |
| AK4     | MIOX   | GPI       | ERO1L   | TPST1  | DLD       |
| ALG1    | MXI1   | LOC642969 | EXT1    | TSTA3  | DLST      |
| ANG     | NANP   | PFKFB1    | EXT2    | TXN    | FASN      |
| ANGPTL4 | NASP   | PFKFB2    | FAM162A | UGP2   | KYNU      |
| ANKZF1  | NDST3  | PFKFB3    | FKBP4   | VCAN   | MLYCD     |
| ARPP19  | NDUFV3 | PFKFB4    | FUT8    | VEGFA  | MVD       |
| ARTN    | NOL3   | PFKL      | GAL3ST1 | VLDLR  | MVK       |
| AURKA   | NSDHL  | PGAM2     | GALE    | XYLT2  | NUDT7     |
| B3GALT6 | NT5E   | PKLR      | GALK1   | ZNF292 | PDHA1     |
| B3GAT1  | P4HA1  | PPP2CA    | GALK2   | BID    | PDHA2     |
| B3GAT3  | P4HA2  | PPP2CB    | GCLC    | CD4    | PDHB      |
| B3GNT3  | PAM    | PPP2R1A   | GFPT1   | LCT    | PDHX      |
| B4GALT1 | PAXIP1 | PPP2R1B   | GLCE    | MPI    | PIPOX     |
| B4GALT2 | PC     | PPP2R5D   | GLRX    | PYGL   | PMVK      |
| B4GALT4 | PDK3   | TPI1P1    | GMPPA   | PYGM   | TDO2      |
| B4GALT7 | PHKA2  | ACO1      | GMPPB   | TREH   | ALDH1A1   |
| BIK     | PKP2   | ACO2      | GNE     | ADH1A  | ALDOB     |
| BPNT1   | PLOD1  | ALDOA     | GNPDA1  | ADH1B  | DAK       |
| CACNA1H | PLOD2  | ALDOC     | GOT1    | ADH1C  | DERA      |
| CAPN5   | PMM2   | ENO1      | GOT2    | ADH4   | G6PD      |
| CASP6   | POLR3K | ENO2      | GPC1    | ADH5   | GLYCTK    |
| CD44    | PPFIA4 | FH        | GPC3    | ADH6   | H6PD      |
| CDK1    | PPIA   | GAPDH     | GPC4    | ADH7   | KHK       |
| CENPA   | PRPS1  | IDH1      | GPR87   | AKR1A1 | LOC729020 |

|        |          |        |         |         |          |
|--------|----------|--------|---------|---------|----------|
| CHPF   | PSMC4    | IDH2   | GUSB    | ALDH1A3 | PGD      |
| CHPF2  | PYGB     | IDH3B  | GYS1    | ALDH1B1 | PGLS     |
| CHST1  | QSOX1    | IDH3G  | GYS2    | ALDH2   | PGM2     |
| CHST12 | RARS     | LDHA   | HAX1    | ALDH3A1 | RPE      |
| CHST2  | RBCK1    | MDH1   | HDLBP   | ALDH3A2 | RPIA     |
| CHST4  | RRAGD    | PCK1   | HMMR    | ALDH3B1 | SHPK     |
| CHST6  | SAP30    | PCK2   | HOMER1  | ALDH3B2 | TALDO1   |
| CITED2 | SDC1     | PFKM   | HS2ST1  | ALDH7A1 | TKT      |
| CLDN3  | SDC2     | PFKP   | HS6ST2  | ALDH9A1 | TPI1     |
| CLDN9  | SDC3     | PGAM1  | HSPA5   | BPGM    | EMB      |
| CLN6   | SDHC     | PGK1   | IDUA    | FBP1    | SLC16A1  |
| COG2   | SLC25A10 | PKM2   | IER3    | FBP2    | SLC16A11 |
| COL5A1 | SLC25A13 | SDHA   | IGFBP3  | G6PC    | SLC16A12 |
| COPB2  | SLC35A3  | SDHB   | IL13RA1 | G6PC2   | SLC16A13 |
| CTH    | SLC37A4  | SDHD   | IRS2    | GALM    | SLC16A3  |
| CXCR4  | SOD1     | SUCLG1 | ISG20   | GCK     | SLC16A4  |
| CYB5A  | SOX9     | AADAT  | KDEL3   | HK1     | SLC16A5  |
| DCN    | SPAG4    | AASS   | KIF20A  | HK2     | SLC16A6  |
| DDIT4  | SRD5A3   | ACACA  | KIF2A   | HK3     | SLC16A7  |
| DEPDC1 | STC1     | ACACB  | LHPP    | LDHAL6A | SLC16A8  |
| DPYSL4 | STC2     | ACLY   | LHX9    | LDHAL6B | SLC5A12  |
| MDH2   | LDHB     |        |         |         |          |

---
